# Supplementary material for: Gene Expression Profiling of Post Mortem midbrain of Parkinson’s Disease patients and Healthy Controls
Source: Preprints.org preprint supplement (doi:10.20944/preprints202311.0975.v1), 2023-11-15
Supplement: Supplementary file 1 [file supplementary]

| **Autopsy Id** | **Brain Bank** | **Age** | **Sex** | **Braak LB Stage** | **Braak Tangle** | **Clinical Diagnoses** |
| --- | --- | --- | --- | --- | --- | --- |
| PD1 | Multiple Sclerosis and Parkinson’s Tissue Bank | 83 | M | Parkinson's/Lewy body findings, Braak LB stage 6, Neocortical Lewy body disease | Braak tangle stage II | Parkinson disease (Present) [+G20] ons:74.00 dur:10.00, |
| PD2 | Multiple Sclerosis and Parkinson’s Tissue Bank | 79 | M | Parkinson's/Lewy body findings, Braak LB stage 6, Neocortical Lewy body disease | Braak tangle stage II | Parkinson disease (Present) [+G20],  Multiple system atrophy, parkinsonian type [MSA-P] (Present) [+G23.2] |
| PD3 | Multiple Sclerosis and Parkinson’s Tissue Bank | 76 | F | Parkinson's/Lewy body findings, Braak LB stage 6, Amygdala-only Lewy body disease | Braak tangle stage II | Parkinson disease (Present) [+G20] ons:53.00 dur:22.00 |
| CRTL1 | Multiple Sclerosis and Parkinson’s Tissue Bank | 84 | M |  |  | No abnormality detected (Present) [+NAD] ons:0.00 dur:0.00 |
| CTRL2 | Multiple Sclerosis and Parkinson’s Tissue Bank | 84 | F |  |  | No abnormality detected (Present) [+NAD] ons:0.00 dur:0.00 |
| CTRL5 | Multiple Sclerosis and Parkinson’s Tissue Bank | 74 | F |  |  | Multiple sclerosis (Present) [+G35],  No abnormality detected (Present) [+NAD] |
| PD4 | Multiple Sclerosis and Parkinson’s Tissue Bank | 89 | F | Parkinson's/Lewy body findings, Braak LB stage 6, Limbic Lewy body disease | Braak tangle stage II | Parkinson disease (Present) [+G20] ons:65.00 dur:24.00 |
| PD5 | Multiple Sclerosis and Parkinson’s Tissue Bank | 80 | M | Parkinson's/Lewy body findings, Braak LB stage 6, Neocortical Lewy body disease | Braak tangle stage II | Parkinson disease (Present) [+G20] ons:71.00 dur:8.00,  Progressive supranuclear ophthalmoplegia [Steele-Richardson-Olszewski] (Present) [+G23.1] |
| CTRL6 | Multiple Sclerosis and Parkinson’s Tissue Bank | 59 | F |  |  | No abnormality detected (Present) [+NAD] |
| PD6 | Multiple Sclerosis and Parkinson’s Tissue Bank | 89 | M | Parkinson's/Lewy body findings, Braak LB stage 6, Neocortical Lewy body disease | Braak tangle stage II | Parkinson disease (Present) [+G20] ons:78.00 dur:11.00 |
| PD7 | Multiple Sclerosis and Parkinson’s Tissue Bank | 73 | M | Parkinson's/Lewy body findings, Braak LB stage 6, Neocortical Lewy body disease | Braak tangle stage II | Parkinson disease (Present) [+G20] ons:57.00 dur:17.00, |
| CTRL3 | Multiple Sclerosis and Parkinson’s Tissue Bank | 87 | F |  |  | No abnormality detected (Present) [+NAD] ons:0.00 dur:0.00 |
| PD8 | Multiple Sclerosis and Parkinson’s Tissue Bank | 80 | M | Parkinson's/Lewy body findings, Braak LB stage 6, Neocortical Lewy body disease | Braak tangle stage II | Parkinson disease (Present) [+G20] ons:56.00 dur:24.00 |
| CTRL4 | Multiple Sclerosis and Parkinson’s Tissue Bank | 81 | F |  |  | No abnormality detected (Present) [+NAD] ons:0.00 dur:0.00 |

**Supplementary Table 4**. clinical features on the subjects included in the study.
